# Supplementary material for: Association between antecedent statin use and decreased mortality in hospitalized patients with COVID-19
Source: PubMed Central journal article supplement (PMC7910606; doi:10.1038/s41467-021-21553-1), 2021-02-26

## SUPPLEMENTAL APPENDIX

### Association Between Antecedent Statin Use and Decreased Mortality in Hospitalized Patients with COVID-19

#### TABLE OF CONTENTS

|        |                                                                                                                                                                                                                                                                                                    |
|--------|----------------------------------------------------------------------------------------------------------------------------------------------------------------------------------------------------------------------------------------------------------------------------------------------------|
| Page 2 | Supplemental Table 1. Mortality rate among patients discharged within 24 hours                                                                                                                                                                                                                     |
| Page 3 | Supplemental Table 2. ICD-10-CM codes used to classify baseline conditions                                                                                                                                                                                                                         |
| Page 4 | Supplemental Table 3. Missing rate of laboratory markers                                                                                                                                                                                                                                           |
| Page 5 | Supplemental Figure 1. Distribution of the estimated propensity score for antecedent statin use, among patients who did and did not actually receive the treatment                                                                                                                                 |
| Page 6 | Supplemental Figure 2. Standardized mean differences in the unmatched and matched sample                                                                                                                                                                                                           |
| Page 7 | Supplemental Figure 3. Multivariable regression to examine association of antecedent statin use with primary endpoint (in-hospital mortality within 30 days) in study sample restricted to patients with history of hypertension, coronary artery disease and stroke or transient ischemic attack. |
| Page 8 | Supplemental Figure 4. Multivariable regression to examine association of antecedent statin use (modified definition)* with primary endpoint (in-hospital mortality within 30 days)                                                                                                                |
| Page 9 | Supplemental Figure 5. Multivariable regression to examine association of inpatient statin use with primary endpoint (in-hospital mortality within 30 days)                                                                                                                                        |

**Supplemental Table 1. Mortality rate among patients discharged within 24 hours**

Among 1508 patients who were in the hospital for less than 24 hours, 267 patients died. Differences in mortality rates by statin use in this excluded population.

|       | Statin Users   | Non-Statin Users |
|-------|----------------|------------------|
| Death | 60/397 (15.1%) | 207/1111 (18.6%) |

Chi-squared p-value = 0.13

**Supplemental Table 2. ICD-10-CM codes used to classify baseline conditions**

| <b>Comorbidity</b>               | <b>ICD-10-CM codes</b>                                                                            |
|----------------------------------|---------------------------------------------------------------------------------------------------|
| Hypertension                     | I10-13, I15-16, O10.1-10.4, O10.9                                                                 |
| Diabetes                         | E08 -11, E13, O24.4                                                                               |
| Coronary Artery Disease          | I21-25, Z98.61, Z95.1                                                                             |
| Heart Failure                    | I09.81, I11.0, I13.0, I50, I42                                                                    |
| Chronic Lung Disease             | J40-47, J60, J66, J67.2, J67.8-67.9, J68.4, J84, G47.3                                            |
| Stroke/transient ischemic attack | I60-64, I69, H34.1, G45                                                                           |
| Atrial arrhythmias               | I47.1, I47.9, I48.0-48.4, I48.91, i48.92, I49.9                                                   |
| Chronic Kidney Disease           | N03, N07-08, N11, N14, N18-19, N29, I12, I13, Z99.2, E10.22, E11.22, E13.22, E08.22, O10.3, D63.1 |
| Chronic Liver Disease            | K70 – K77                                                                                         |

**Supplemental Table 3. Missing laboratory markers in the propensity-matched cohort**

| <b>Laboratory marker</b> | <b>Statin Users (648)</b> | <b>Non-statin Users (648)</b> |
|--------------------------|---------------------------|-------------------------------|
| White blood cell count   | 1 (0.1%)                  | 4 (0.6%)                      |
| Platelet count           | 6 (0.9%)                  | 8 (1.2%)                      |
| Creatinine               | 0                         | 0                             |
| AST                      | 7 (1.0%)                  | 10 (1.5%)                     |
| ALT                      | 11 (1.7%)                 | 12 (1.9%)                     |
| Hs-Troponin              | 34 (5.2%)                 | 47 (7.3%)                     |
| Albumin                  | 5 (0.8%)                  | 11 (1.7%)                     |
| D-dimer                  | 92 (14.2%)                | 111 (17.1%)                   |
| Ferritin                 | 38 (5.9%)                 | 59 (9.1%)                     |
| ESR                      | 80 (12.3%)                | 74 (11.4%)                    |
| CRP                      | 38 (5.9%)                 | 43 (6.6%)                     |

ALT = alanine aminotransferase; AST = aspartate aminotransferase; CRP = C-reactive protein; ESR = erythrocyte sedimentation rate; hs-Troponin = high sensitivity Troponin T; IQR = interquartile range

**Supplemental Figure 1. Distribution of the estimated propensity score for antecedent statin use, among patients who did and did not actually receive the treatment**

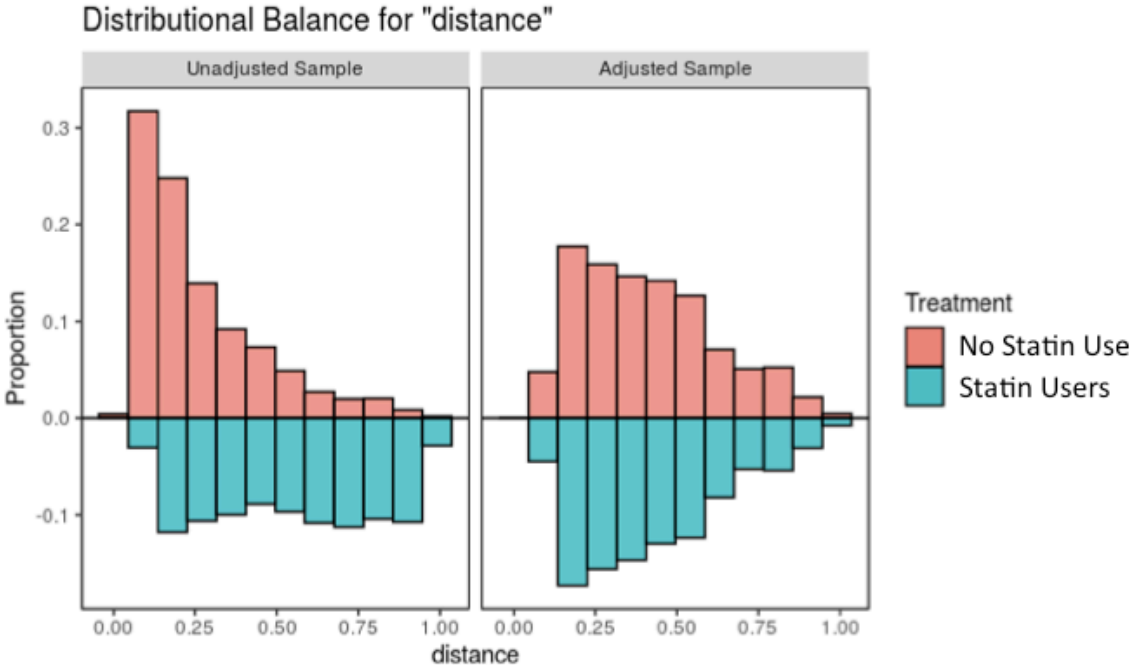

**Supplemental Figure 2. Standardized mean differences in the unmatched and matched sample**

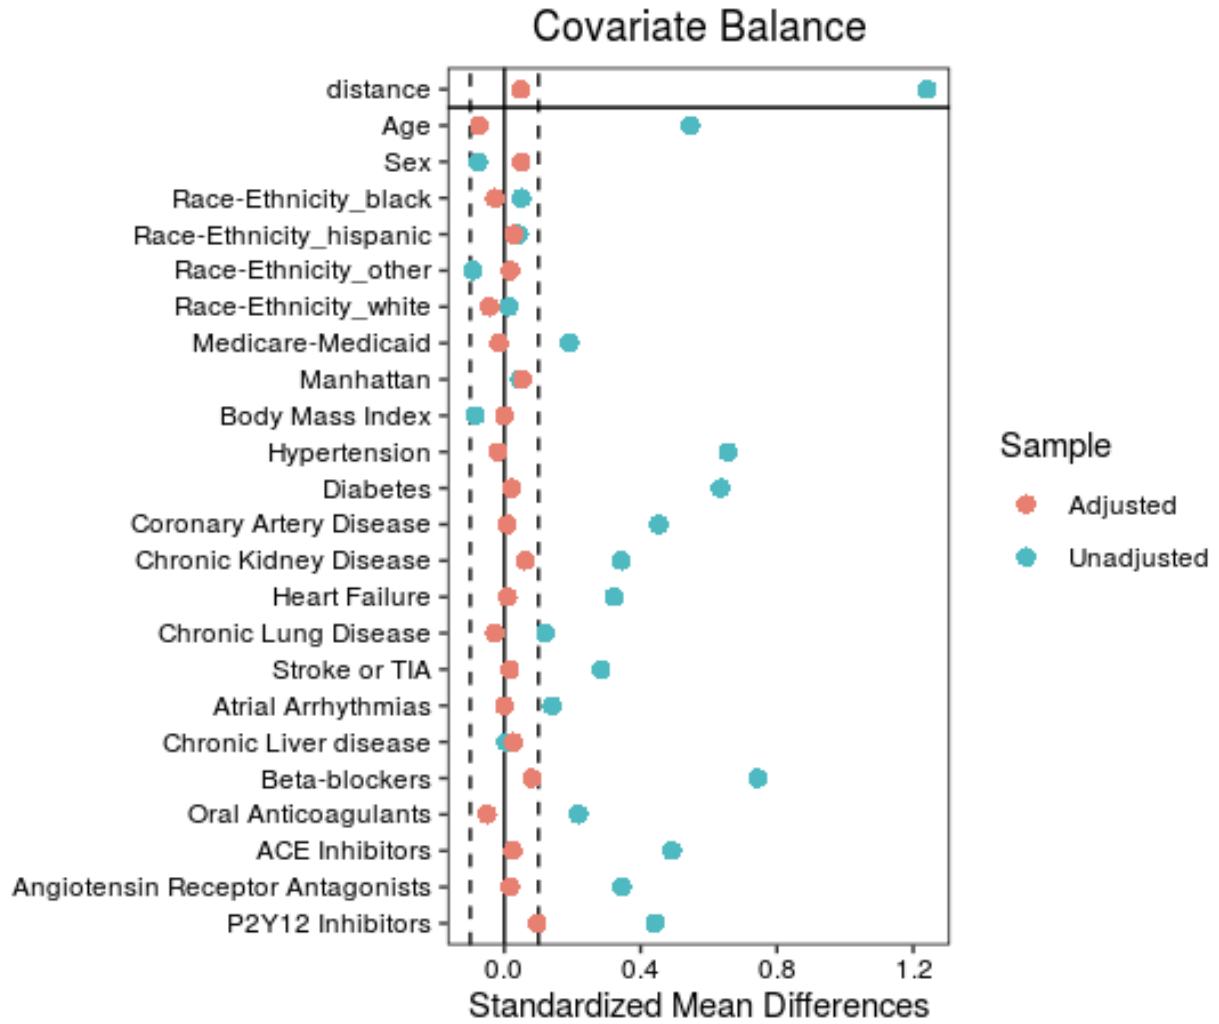

**Supplemental Figure 3. Multivariable regression to examine association of antecedent statin use with primary endpoint (in-hospital mortality within 30 days) in study sample restricted to patients with history of hypertension, coronary artery disease and stroke or transient ischemic attack**

Forest plot demonstrating the odds ratio (OR) and 95% confidence interval (CI) (N = 1516 independent patients)

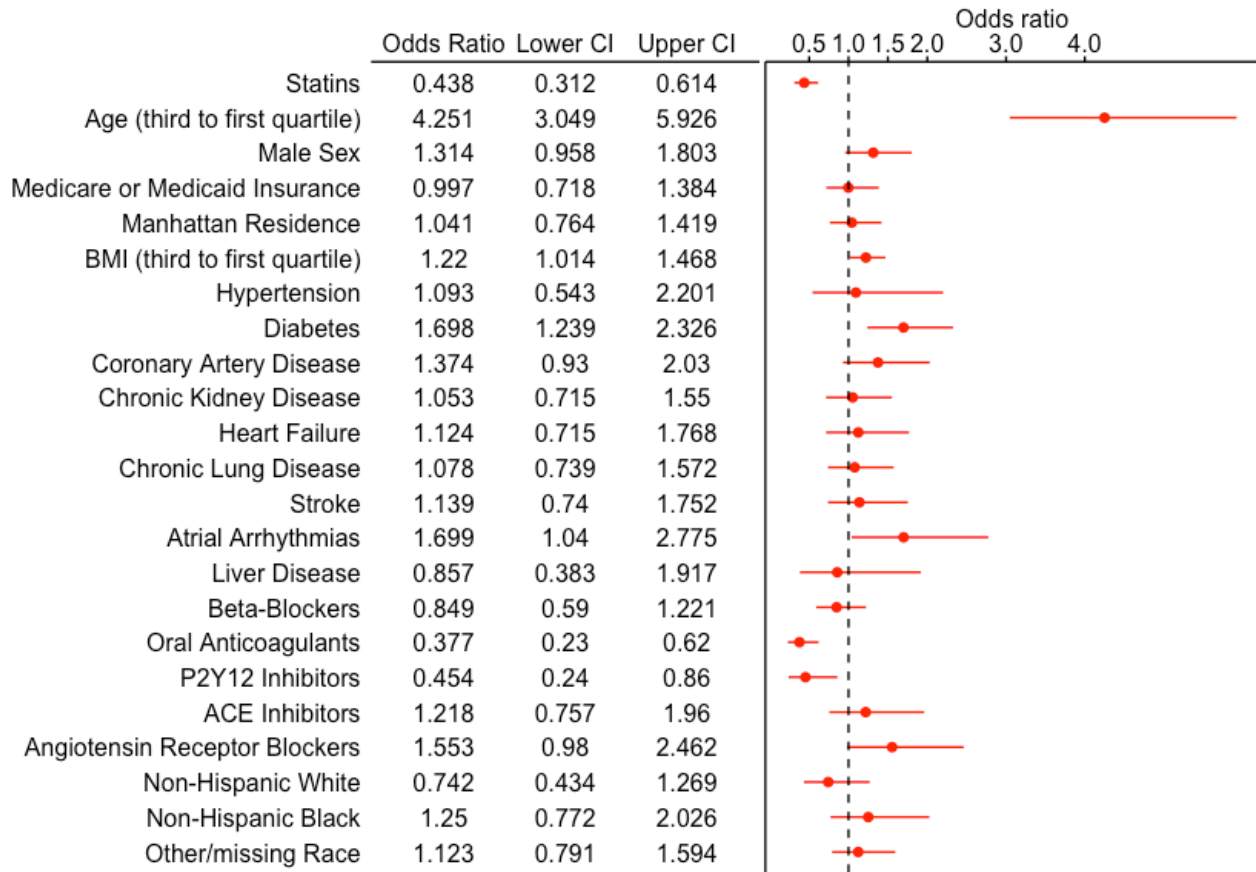

**Supplemental Figure 4. Multivariable regression to examine association of statin use (modified definition)\* with primary endpoint (in-hospital mortality within 30 days)**  
 Forest plot demonstrating the odds ratio (OR) and 95% confidence interval (CI) (N = 2626 independent patients)

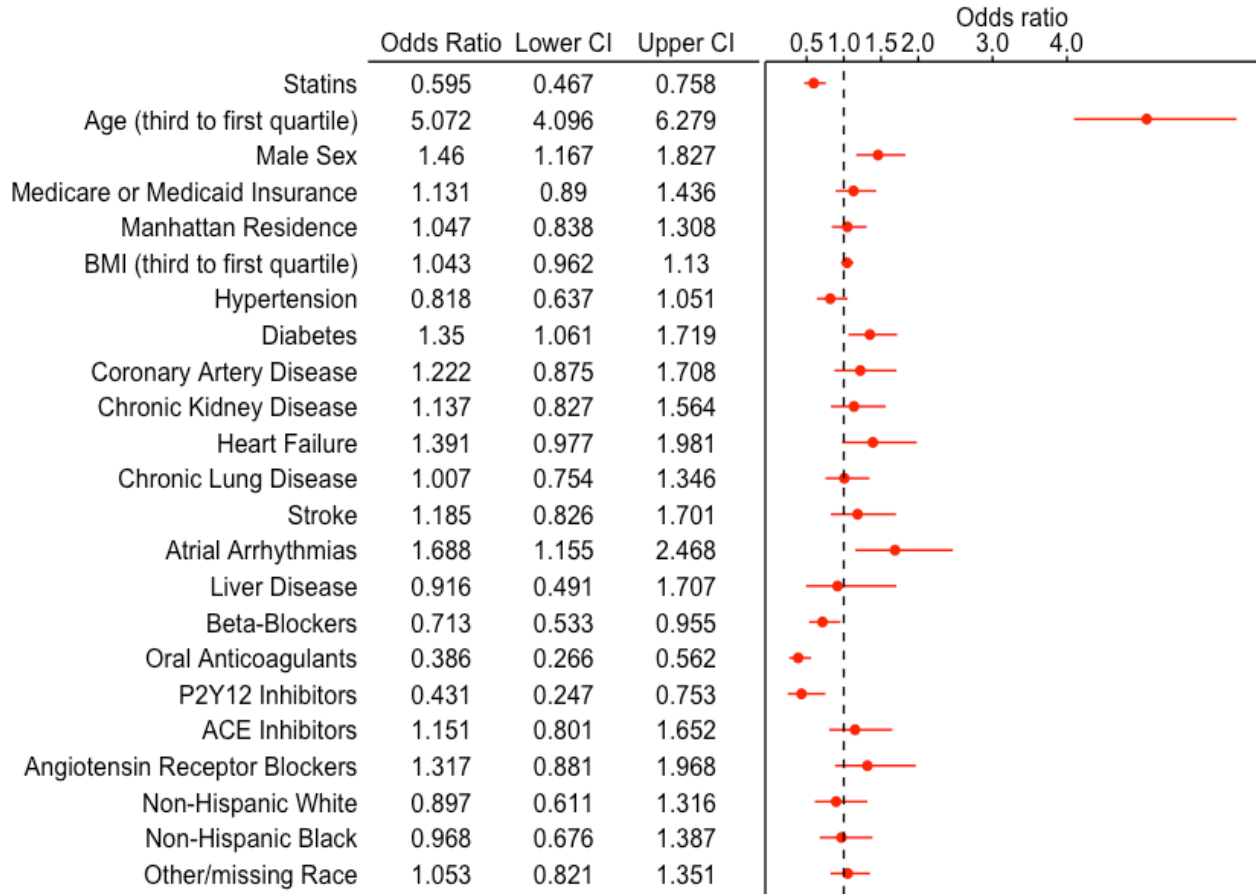

\*In this analysis, patients were classified as statin users if they were either prescribed outpatient statin use per the electronic medical record or received statins during hospitalization



**Supplemental Figure 5. Multivariable regression to examine association of inpatient statin use with primary endpoint (in-hospital mortality within 30 days)**

Forest plot demonstrating the odds ratio (OR) and 95% confidence interval (CI) (N = 2626 independent patients)

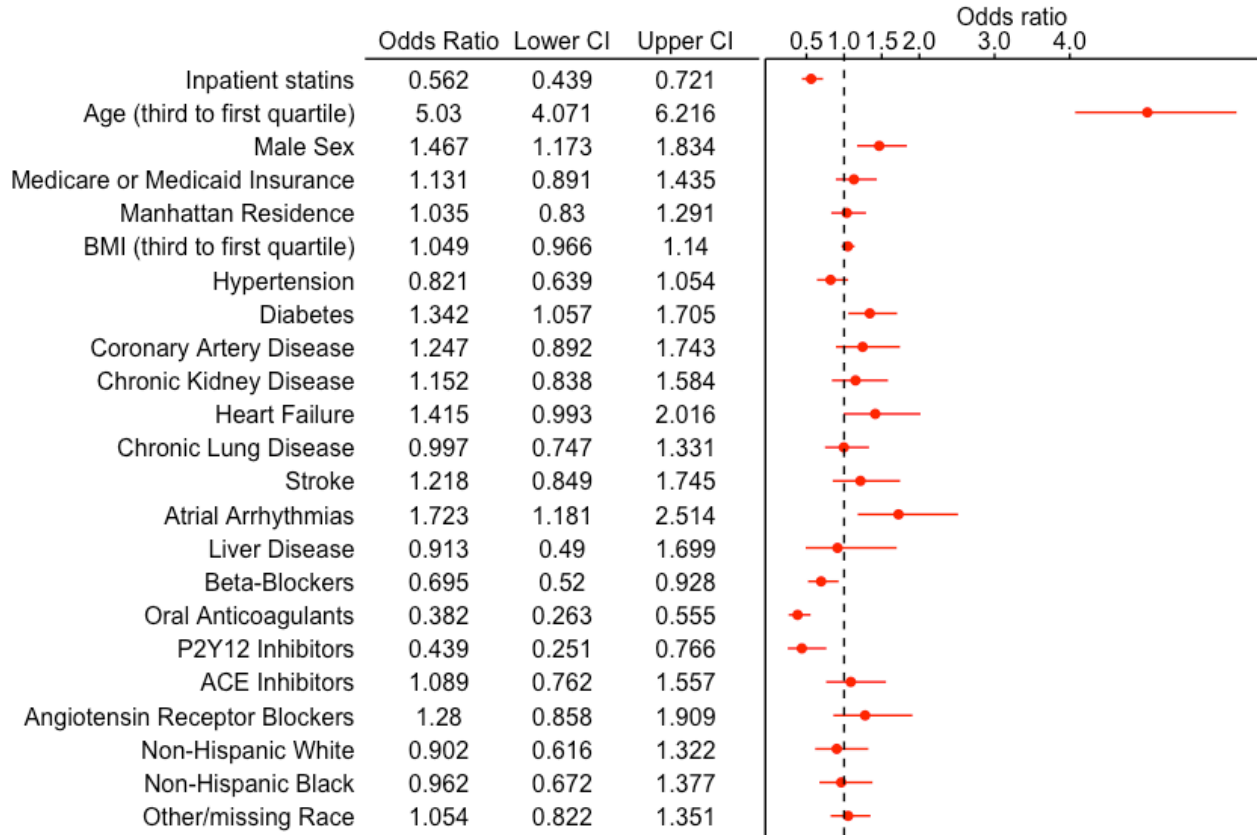

Supplement: 41467_2021_21553_MOESM1_ESM.pdf [file 41467_2021_21553_MOESM1_ESM.pdf]
